# Supplementary material for: Natural Products from Singapore Soil-Derived Streptomycetaceae Family and Evaluation of Their Biological Activities
Source: MDPI journal article supplement (doi:10.3390/molecules28155832), 2023-08-02
Supplement: s1 [file s1]

Supplementary information for

# Natural Products from Singapore Soil-Derived *Streptomycetaceae* Family and Evaluation of Their Biological Activities

Elaine-Jinfeng Chin †, Kuan-Chieh Ching †, Zann Y. Tan, Mario Wibowo, Chung-Yan Leong, Lay-Kien Yang, Veronica W. P. Ng, Deborah C. S. Seow, Yoganathan Kanagasundaram \* and Siew-Bee Ng \*

Singapore Institute of Food and Biotechnology Innovation (SIFBI), Agency for Science, Technology and Research (A\*STAR), Singapore 138673, Singapore; elainec@sifbi.a-star.edu.sg (E.-J.C.); chingkc@sifbi.a-star.edu.sg (K.-C.C.); tanyq@sifbi.a-star.edu.sg (Z.Y.T.); mario\_wibowo@sifbi.a-star.edu.sg (M.W.); leongcy@sifbi.a-star.edu.sg (C.-Y.L.); yanglk@sifbi.a-star.edu.sg (L.-K.Y.); ngwp@sifbi.a-star.edu.sg (V.W.P.N.); seowcs@sifbi.a-star.edu.sg (D.C.S.S.)  
\* Correspondence: yoganathan@sifbi.a-star.edu.sg (Y.K.); ngbs@sifbi.a-star.edu.sg (S.-B.N.); Tel.: +65-62792716 (Y.K.); +65-62792727 (S.-B.N.)  
† These authors contributed equally to this work.

**Figure S1.** UV spectrum for **1**.

**Figure S2.** (+)-HRESIMS spectrum for **1**.

**Figure S3.** <sup>1</sup>H NMR spectrum ((CD<sub>3</sub>)<sub>2</sub>CO, 400 MHz) of **1**.

**Figure S4.** COSY spectrum of **1**.

**Figure S5.** HSQC spectrum of **1**.

**Figure S6.** HMBC spectrum of **1**.

**Figure S7.** <sup>1</sup>H NMR spectrum ((CD<sub>3</sub>)<sub>2</sub>CO, 400 MHz) of tetronomycin.

**Figure S8.** HSQC spectrum of tetronomycin.

**Figure S9.** HMBC spectrum of tetronomycin.

**Figure S10.** Dose response curve against *Staphylococcus aureus* Rosenbach (SA25923), *Klebsiella aerogenes* (EA13048), *Pseudomonas aeruginosa* (PA9027), *Candida albicans* (CA10231) and *Aspergillus fumigatus* (AF46645). A) Nonactin, B) Monactin, C) Dinactin, D) 4E-Deacetylchromomycin A3, E) Chromomycin A2, F) Lysolipin I, G) Soyasaponin II and H) Naphthomevalin.

**Figure S11.** Dose response curve against A549 human lung carcinoma cells, and two pancreatic cancer cell lines MIA PaCa-2 and PANC-1 cells. A) Nonactin, B) Monactin, C) Dinactin, D) 4E-Deacetylchromomycin A3, E) Chromomycin A2, F) Lysolipin I, G) Soyasaponin II and H) Naphthomevalin.

**Figure S12.** Dose response curve against *Klebsiella aerogenes* (EA13048), *Pseudomonas aeruginosa* (PA9027), *Candida albicans* (CA10231) and *Aspergillus fumigatus* (AF46645). A) **1** and B) Tetronomycin.

**Table S1.** Antimicrobial and cytotoxicity primary screening results of 4 actinobacteria strains grown in 5 different growth media.

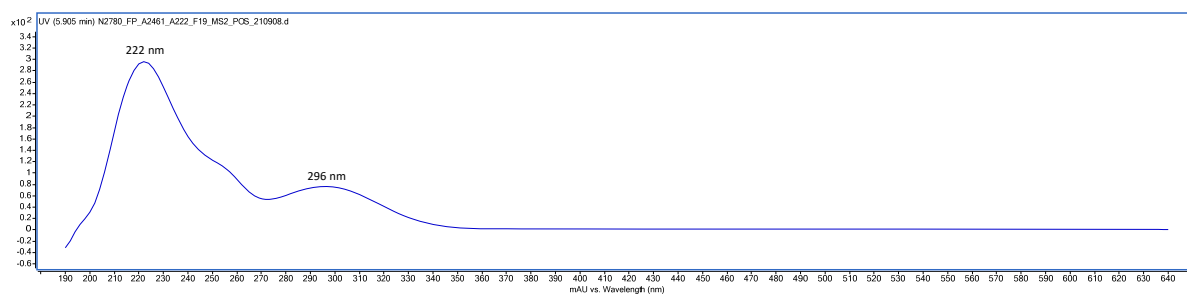

**Figure S1.** UV spectrum for **1**.

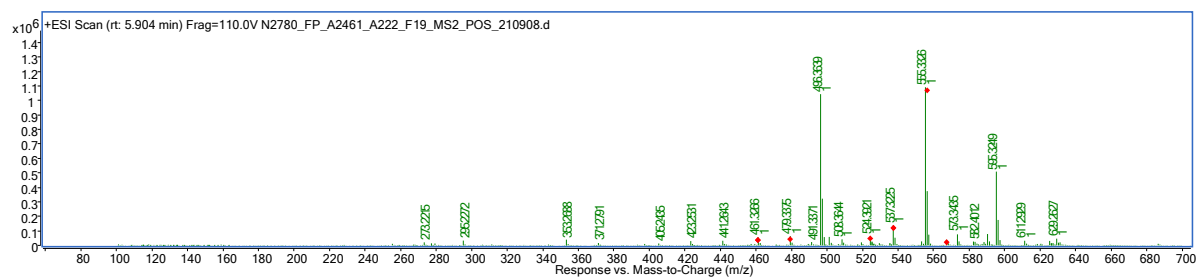

**Figure S2.** (+)-HRESIMS spectrum for **1**.

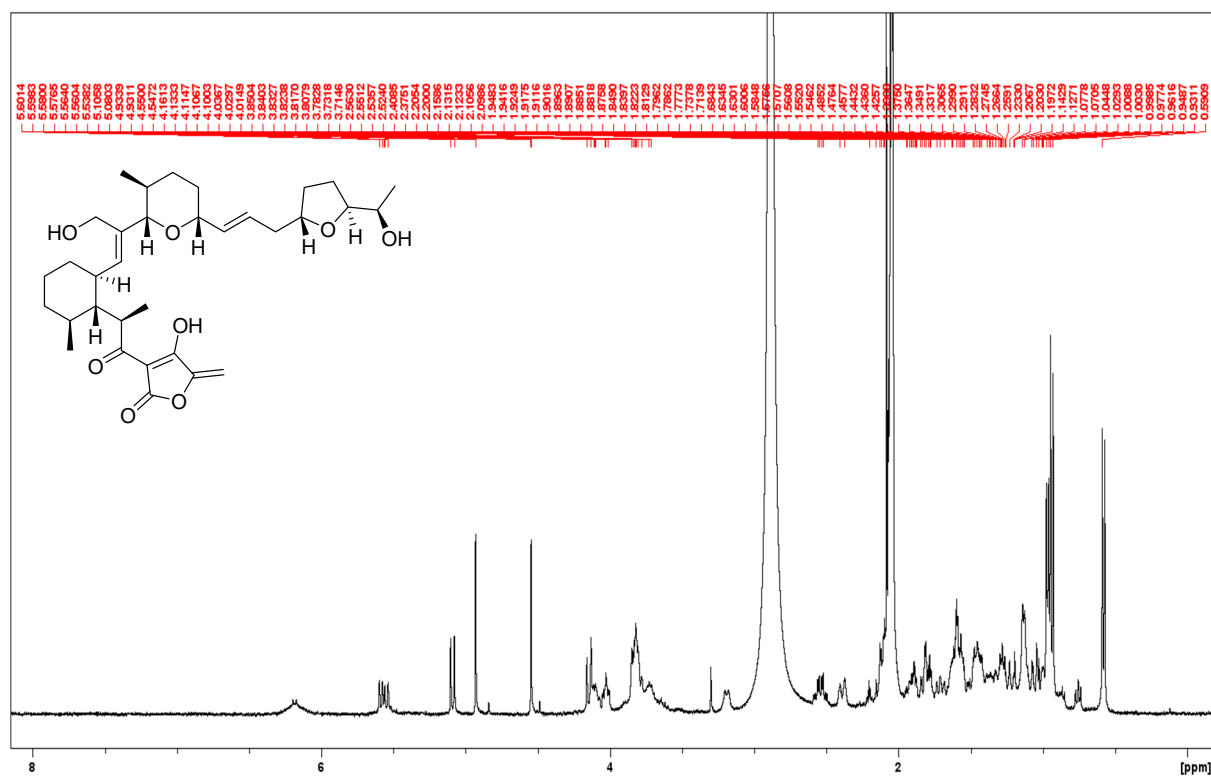

**Figure S3.**  $^1\text{H}$  NMR spectrum ( $(\text{CD}_3)_2\text{CO}$ , 400 MHz) of **1**.

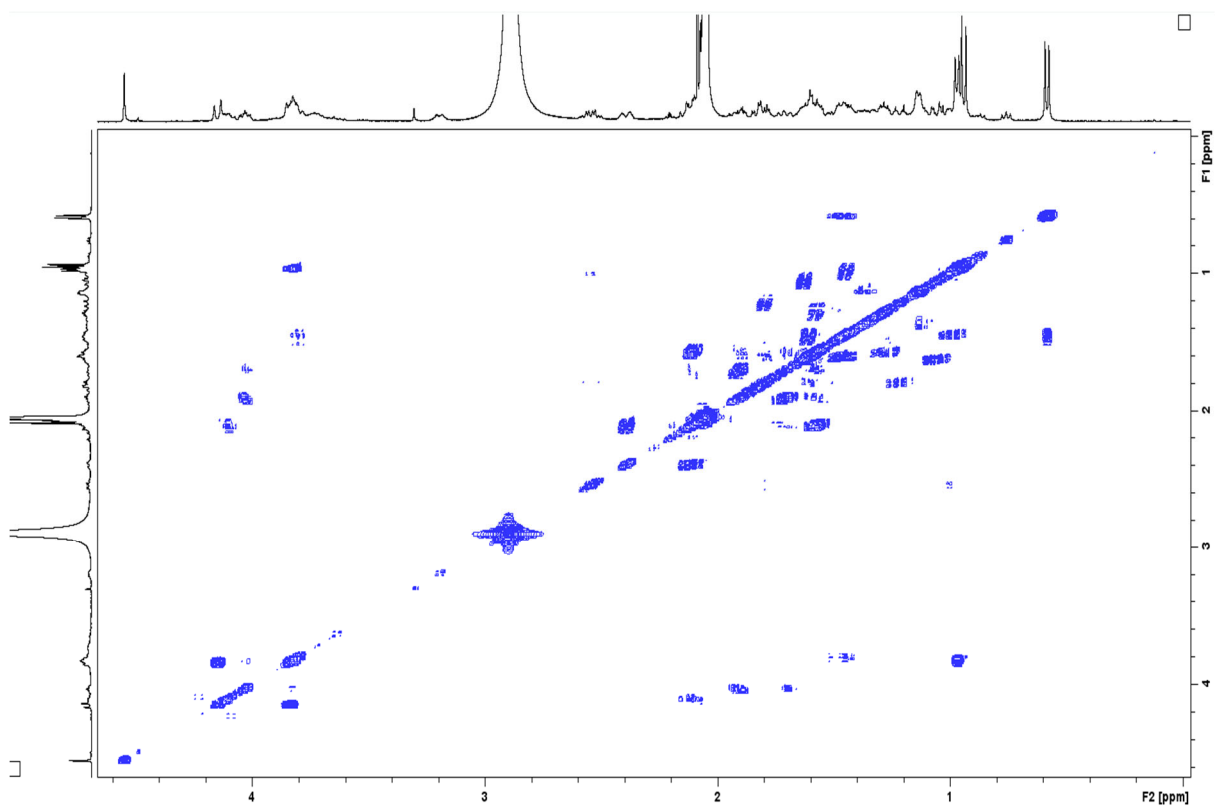

Figure S4. COSY spectrum of 1.

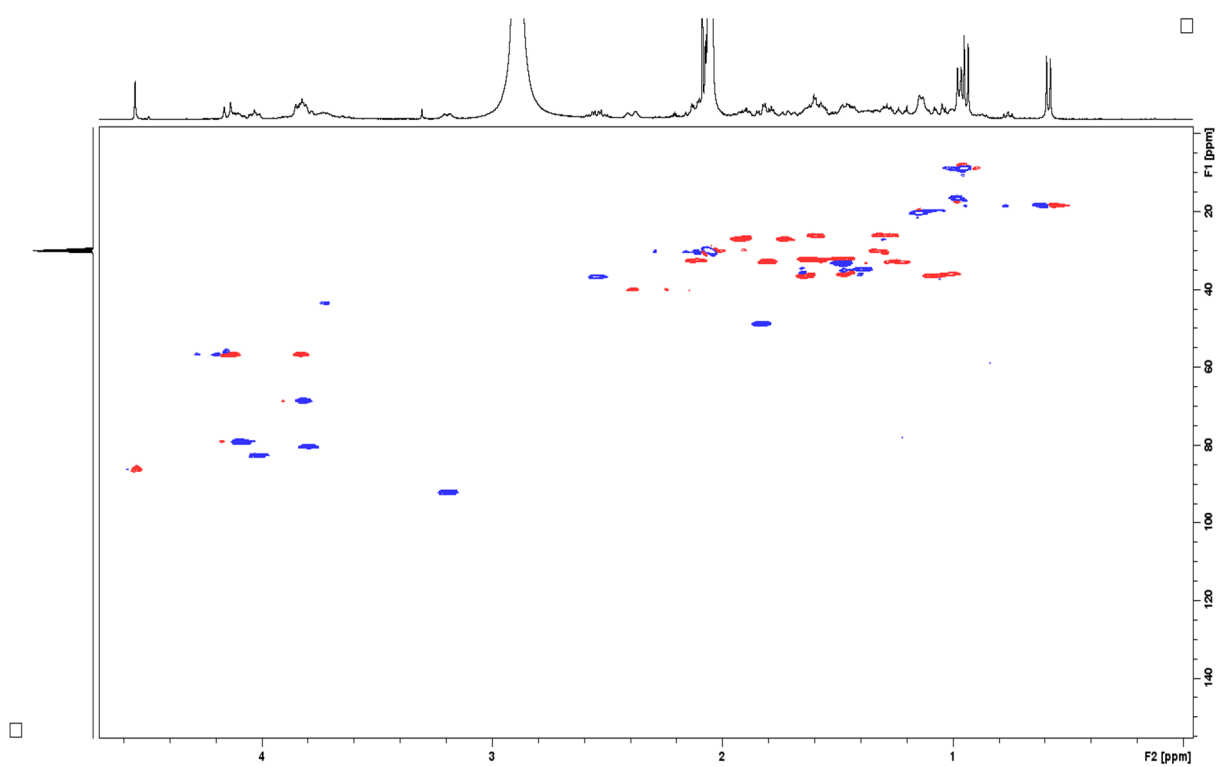

Figure S5. HSQC spectrum of 1.

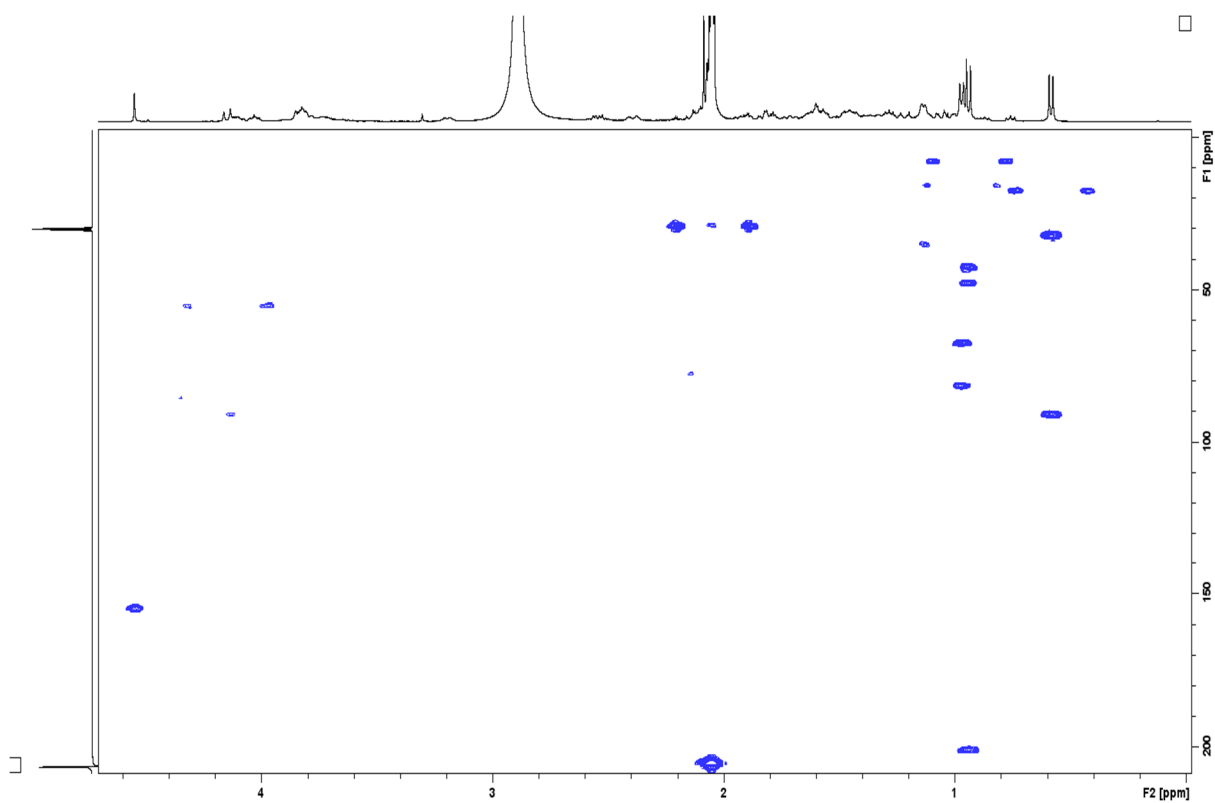

**Figure S6.** HMBC spectrum of **1**.

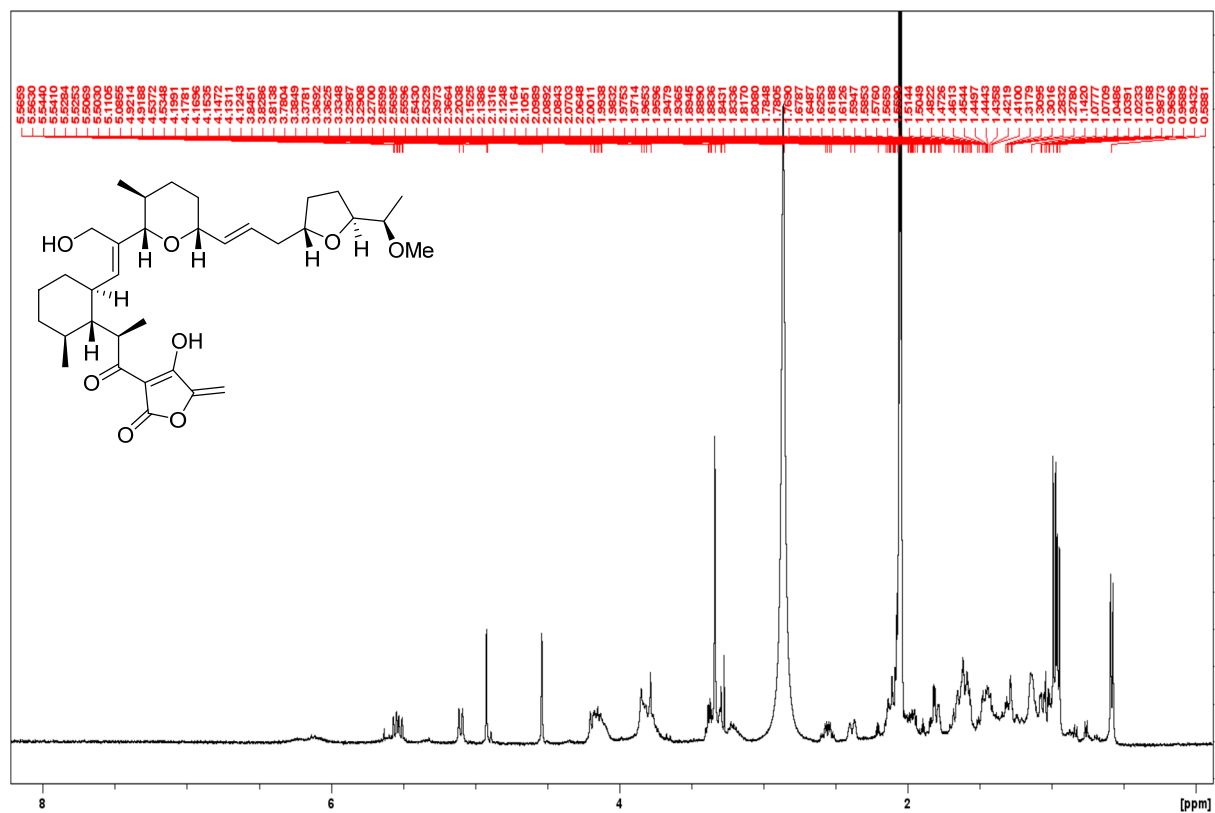

**Figure S7.**  $^1\text{H}$  NMR spectrum ( $(\text{CD}_3)_2\text{CO}$ , 400 MHz) of tetronomycin.

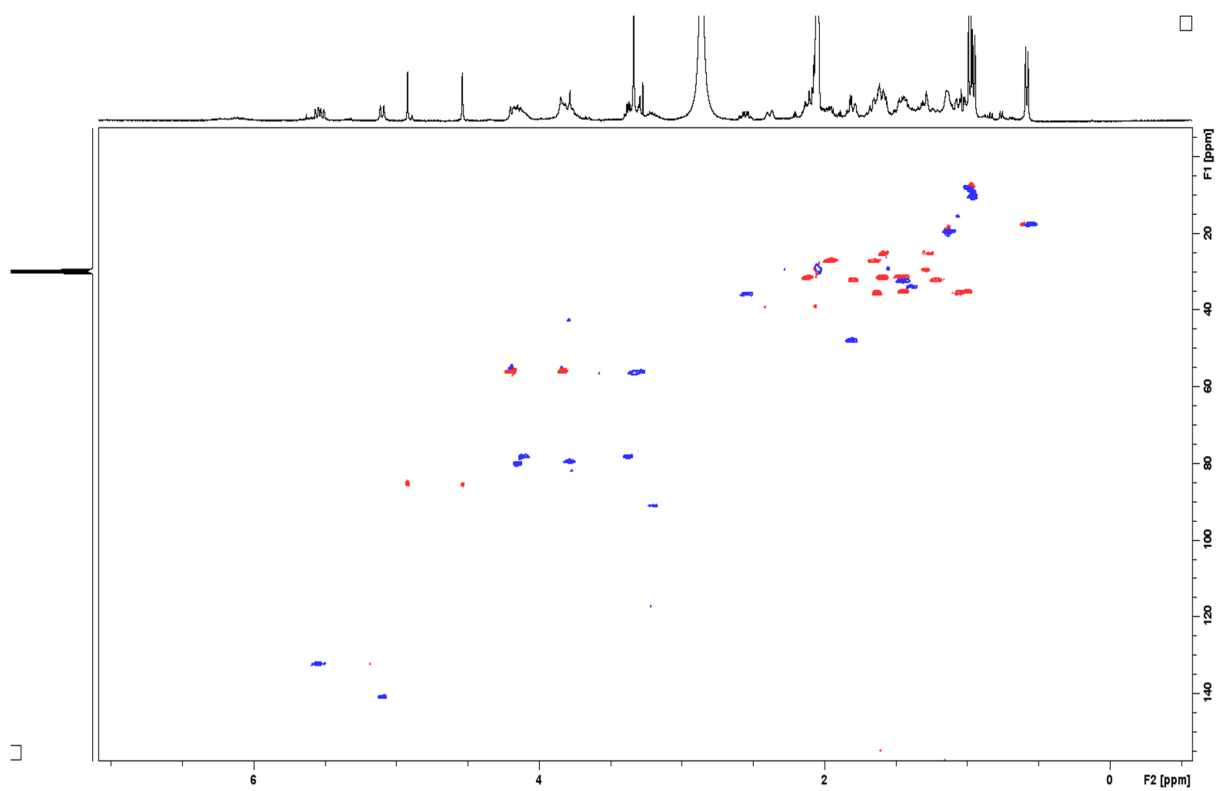

**Figure S8.** HSQC spectrum of tetronomycin.

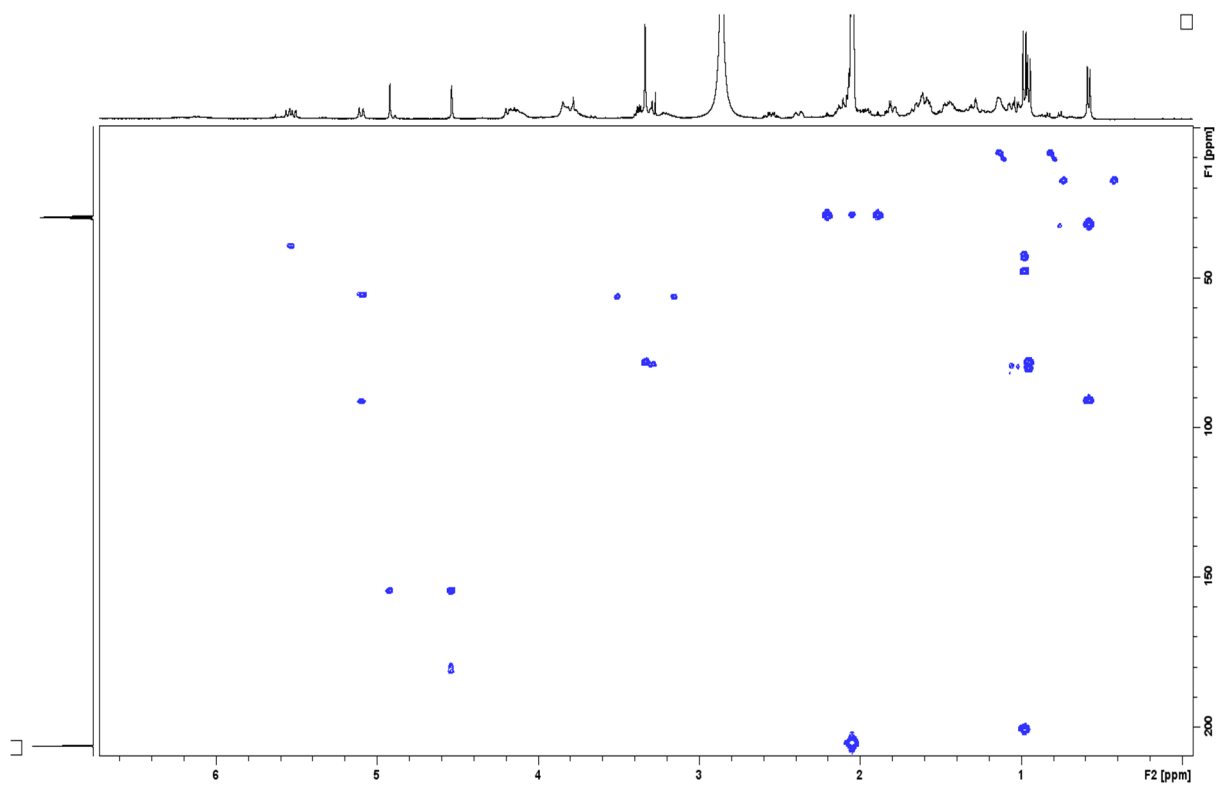

**Figure S9.** HMBC spectrum of tetronomycin.

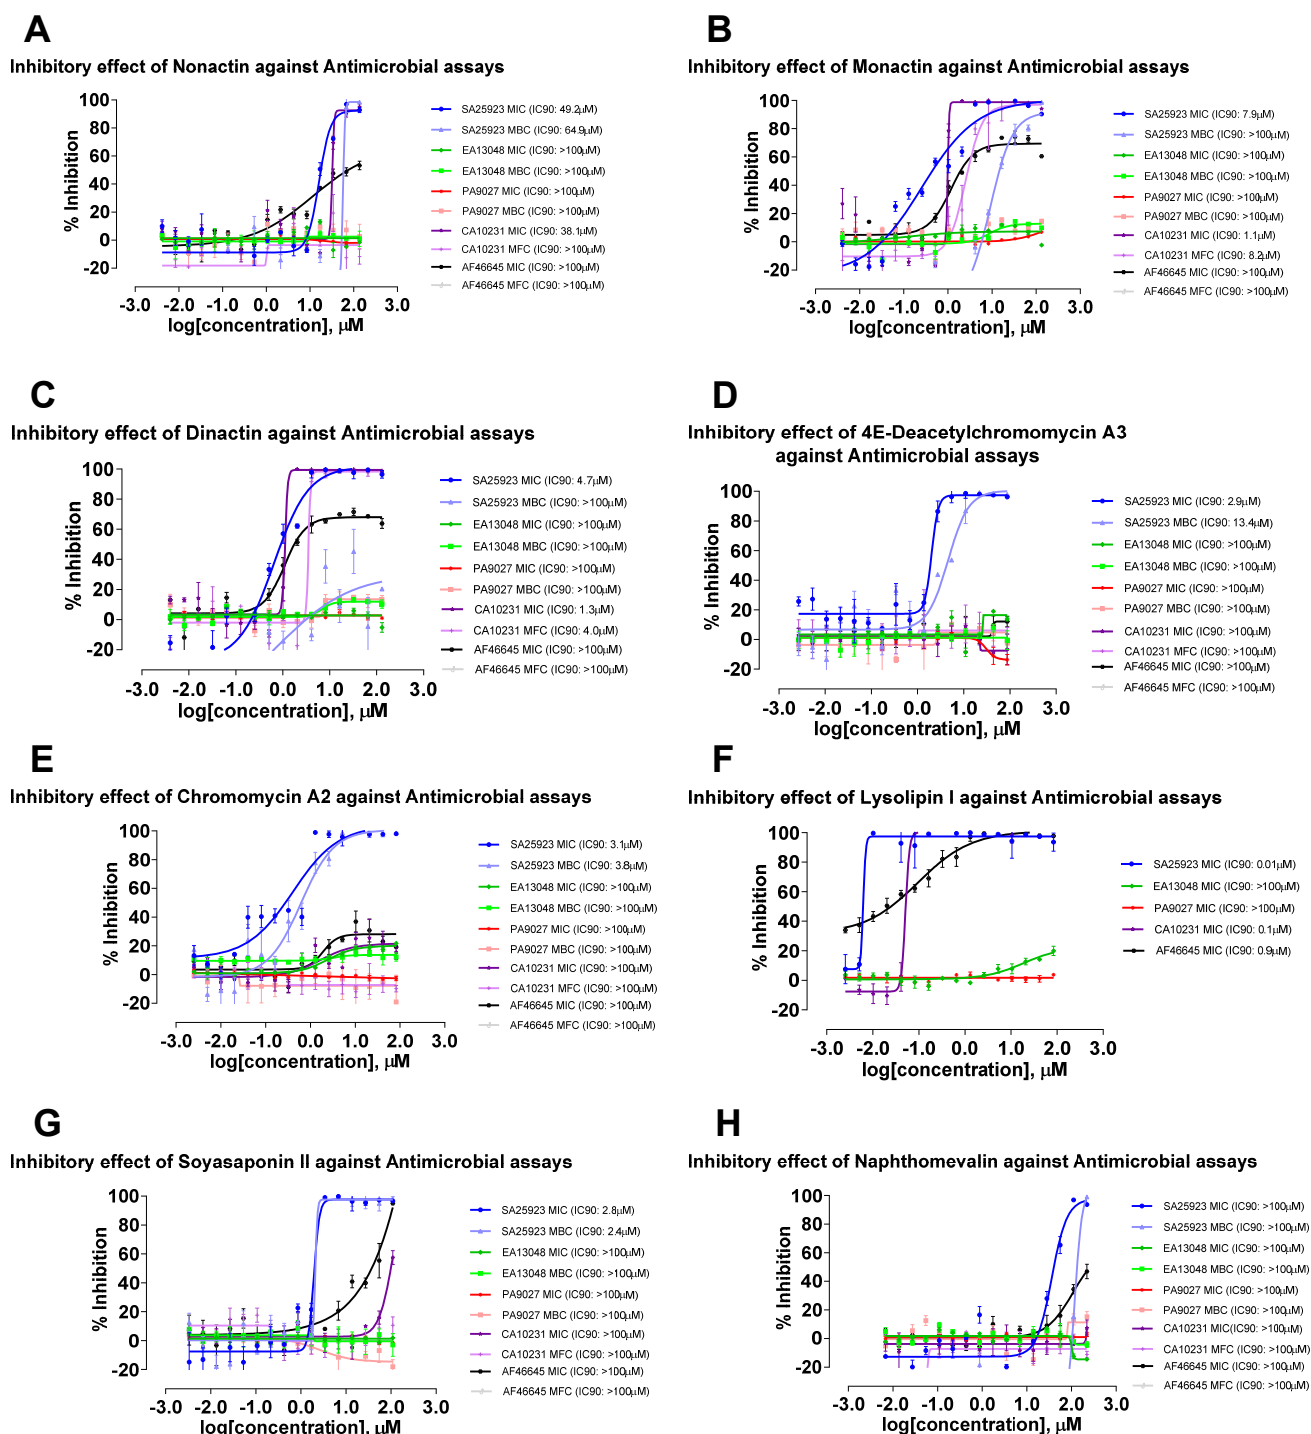

**Figure S10.** Dose response curve against *Staphylococcus aureus* Rosenbach (SA25923), *Klebsiella aerogenes* (EA13048), *Pseudomonas aeruginosa* (PA9027), *Candida albicans* (CA10231) and *Aspergillus fumigatus* (AF46645). A) Nonactin, B) Monactin, C) Dinactin, D) 4E-Deacetylchromomycin A3, E) Chromomycin A2, F) Lysolipin I, G) Soyasaponin II and H) Naphthomevalin.

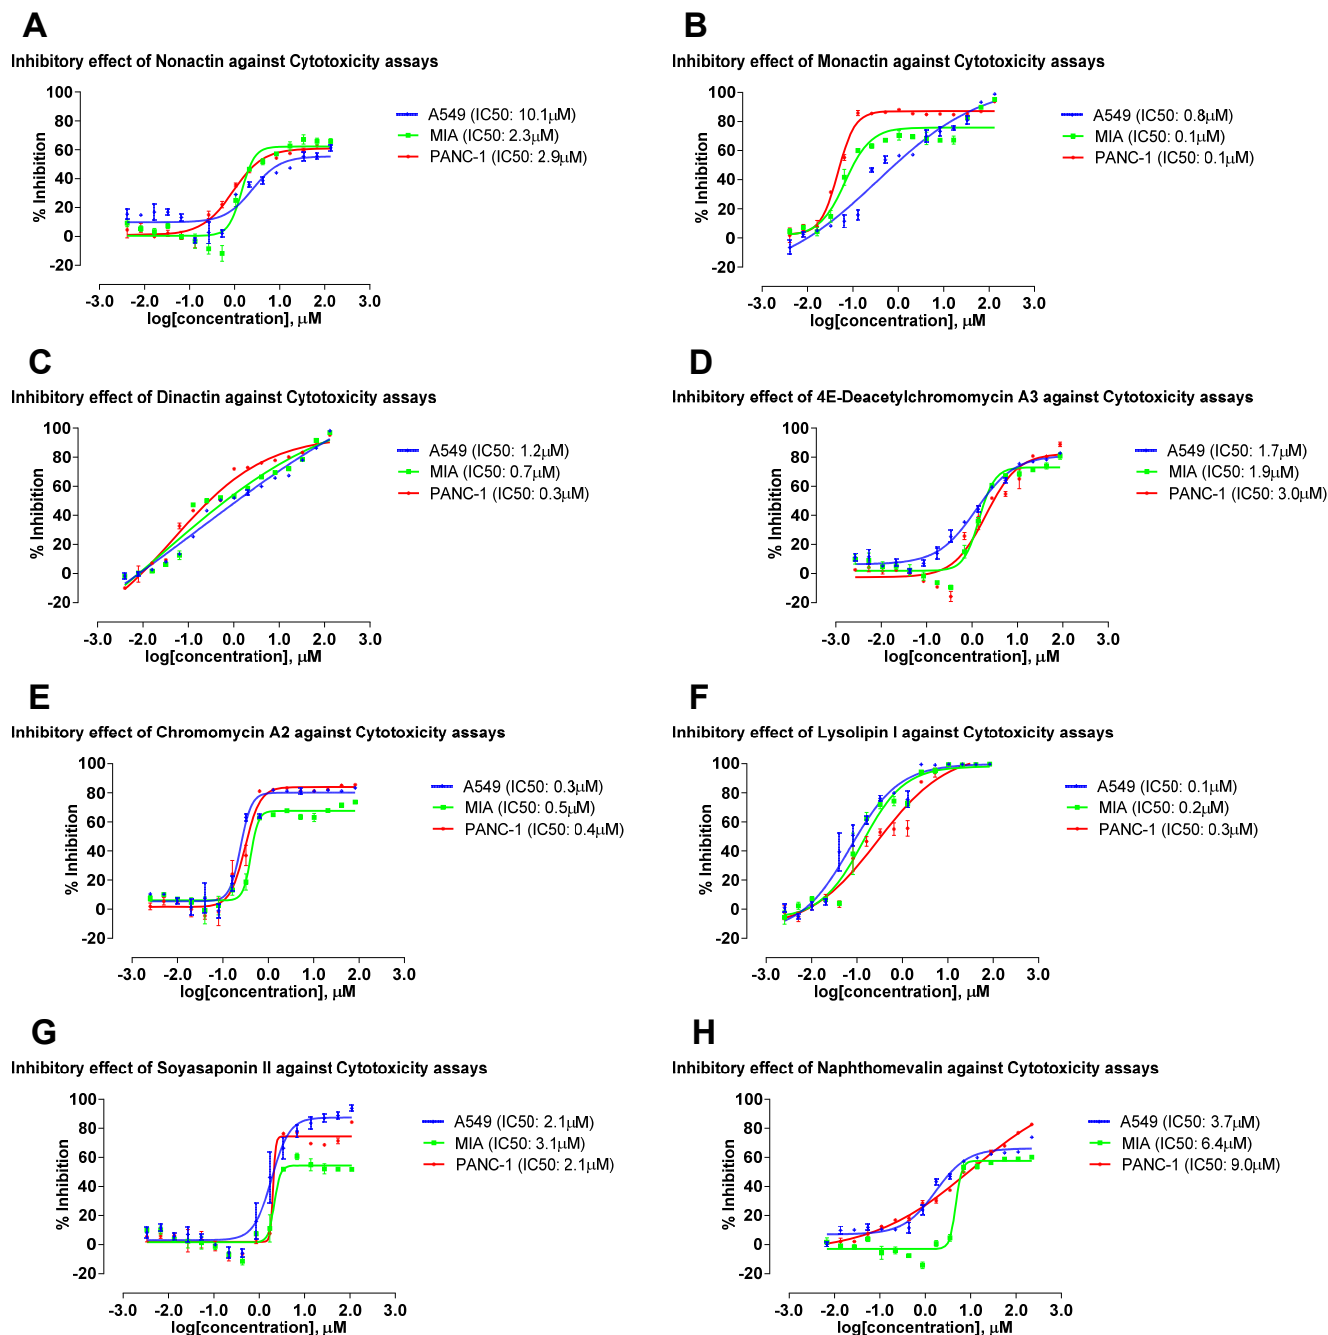

**Figure S11.** Dose response curve against A549 human lung carcinoma cells, and two pancreatic cancer cell lines MIA PaCa-2 and PANC-1 cells. A) Nonactin, B) Monactin, C) Dinactin, D) 4E-Deacetylchromomycin A3, E) Chromomycin A2, F) Lysolipin I, G) Soyasaponin II and H) Naphthomevalin.

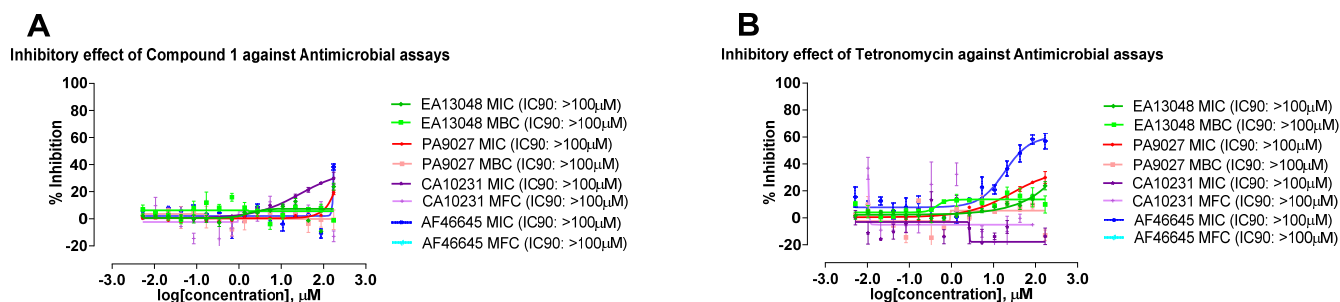

**Figure S12.** Dose response curve against *Klebsiella aerogenes* (EA13048), *Pseudomonas aeruginosa* (PA9027), *Candida albicans* (CA10231) and *Aspergillus fumigatus* (AF46645). A) **1** and B) Tetronomycin.

**Table S1.** Antimicrobial and cytotoxicity primary screening results of 4 actinobacteria strains grown in 5 different growth media.

| Samples | Media  | Antimicrobial (% Inhibition) |     |      |      |      | Cytotoxicity (% Inhibition) |      |        |
|---------|--------|------------------------------|-----|------|------|------|-----------------------------|------|--------|
|         |        | KA                           | PA  | SA   | CA   | AF   | A549                        | MIA  | PANC-1 |
| A1099   | CA02LB | <80                          | <80 | 85.9 | 96.7 | <80  | <80                         | <80  | <80    |
|         | CA07LB | <80                          | <80 | 88.9 | 96.3 | <80  | <80                         | <80  | <80    |
|         | CA08LB | <80                          | <80 | 99.0 | 99.7 | <80  | <80                         | <80  | <80    |
|         | CA09LB | <80                          | <80 | <80  | <80  | <80  | <80                         | <80  | <80    |
|         | CA10LB | <80                          | <80 | <80  | <80  | <80  | <80                         | <80  | <80    |
| A1174   | CA02LB | <80                          | <80 | <80  | <80  | <80  | <80                         | <80  | <80    |
|         | CA07LB | <80                          | <80 | <80  | <80  | <80  | <80                         | <80  | <80    |
|         | CA08LB | <80                          | <80 | 98.1 | <80  | <80  | 81.8                        | <80  | <80    |
|         | CA09LB | <80                          | <80 | <80  | <80  | <80  | <80                         | <80  | <80    |
|         | CA10LB | <80                          | <80 | <80  | <80  | <80  | <80                         | <80  | <80    |
| A1301   | CA02LB | <80                          | <80 | <80  | <80  | 97.0 | <80                         | <80  | <80    |
|         | CA07LB | <80                          | <80 | 80.9 | 92.8 | <80  | 99.4                        | 98.8 | 96.3   |
|         | CA08LB | <80                          | <80 | 99.5 | <80  | <80  | <80                         | <80  | <80    |
|         | CA09LB | <80                          | <80 | 99.5 | <80  | <80  | <80                         | <80  | <80    |
|         | CA10LB | <80                          | <80 | 92.2 | 98.9 | 95.5 | 98.9                        | 96.3 | 95.6   |
| A2461   | CA02LB | <80                          | <80 | <80  | <80  | <80  | <80                         | <80  | <80    |
|         | CA07LB | <80                          | <80 | <80  | <80  | <80  | <80                         | <80  | <80    |
|         | CA08LB | <80                          | <80 | 98.5 | <80  | <80  | <80                         | <80  | <80    |
|         | CA09LB | <80                          | <80 | <80  | <80  | <80  | <80                         | <80  | <80    |
|         | CA10LB | <80                          | <80 | 99.1 | <80  | <80  | <80                         | <80  | <80    |

<sup>1</sup>KA = *Klebsiella aerogenes*, PA = *Pseudomonas aeruginosa*, SA = *Staphylococcus aureus* Rosenbach, CA = *Candida albicans* and AF = *Aspergillus fumigatus*.

<sup>2</sup>A549 = human lung carcinoma cells, MIA = pancreatic cancer cells and PANC-1 = pancreatic cancer cells.

Antimicrobial effect and cytotoxic activity (average growth inhibition  $\geq$  80%).
